# Supplementary material for: Pulcherrimin protects Bacillus subtilis against oxidative stress during biofilm development
Source: Research Square preprint supplement (doi:10.21203/rs.3.rs-2505116/v1), 2023-02-01
Supplement: Supplementary file 1 [file f36cc823e8312e8c3998fc3d.pdf]

## Supplemental Figure Legends

### **Supplemental Figure 1: Loss or overexpression of pulcherrimin biosynthesis genes does not affect cell growth of *B. subtilis*.**

Growth of the wild type, pulcherrimin mutant and complementation strain in LB broth with or without IPTG supplementation at 1mM was accessed in a 96-well plate for 16 hours at 37°C. Experiment was performed with 8 technical replicates and average OD<sub>600</sub> nm values were plotted using Graphpad Prism 9. Error bars correspond to standard deviation.

**Supplemental Figure 2: Principal Component Analysis carried out with expression of 4,237 genes.** Two principal components (PCs) with most of the variation are shown. PC1 (83.12%) separates the pulcherrimin mutant ( $\Delta ycmC$ -*cypX*, blue triangles) from the wild type (3610, orange circles) RNA- Seq samples.

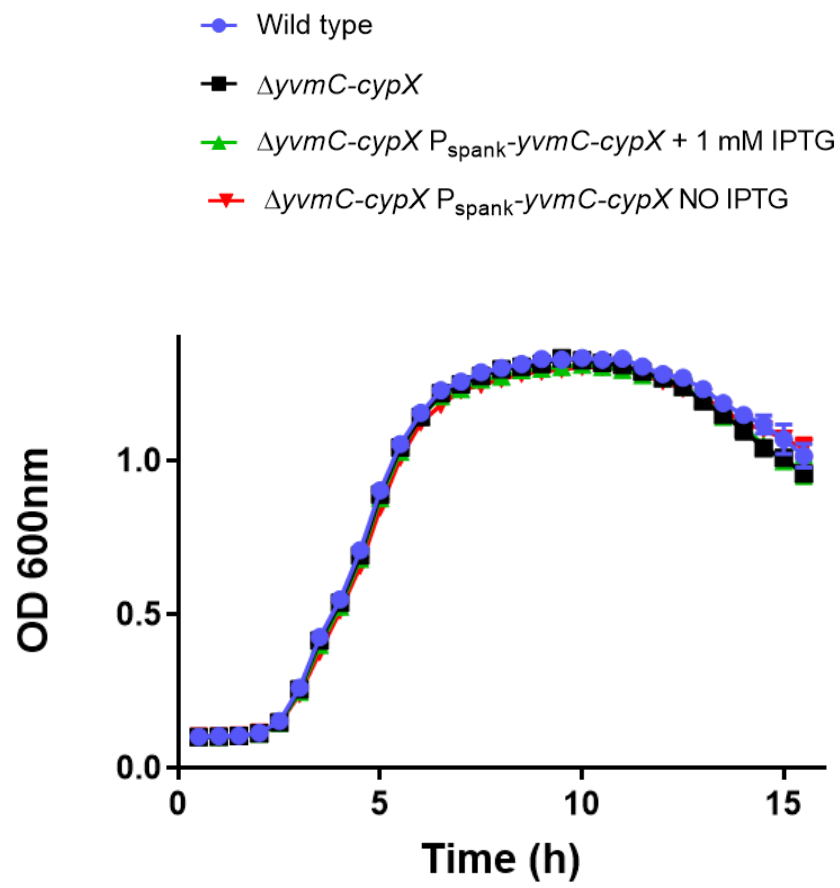

Figure S1

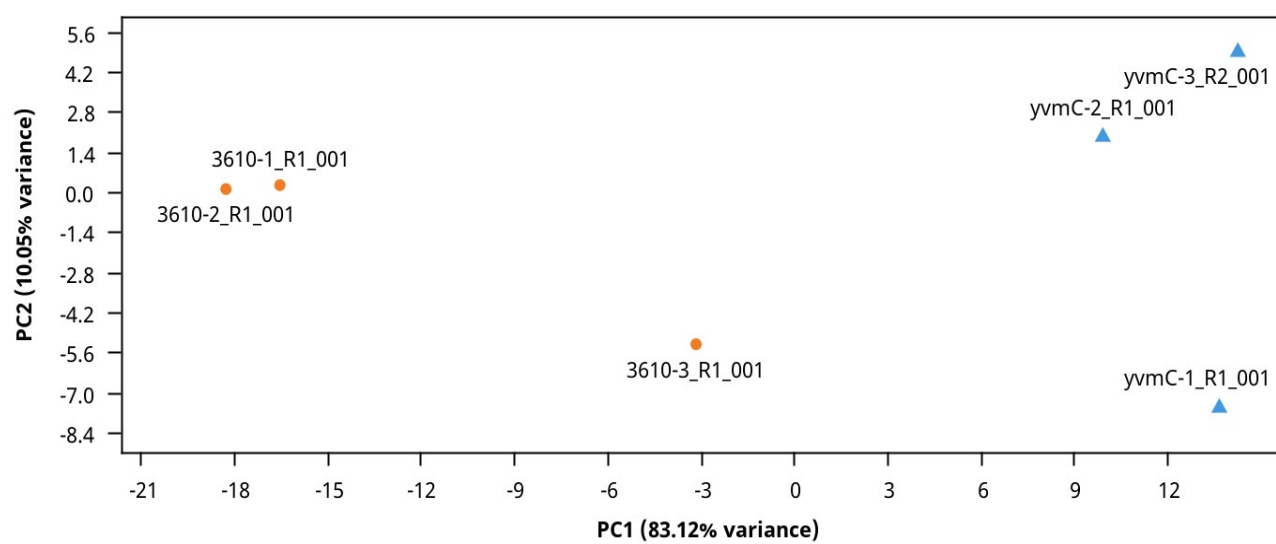

**Figure S2**
